# Supplementary material for: Endothelial Cell GATA2 Modulates the Cardiomyocyte Stress Response through the Regulation of Two Long Non-Coding RNAs
Source: MDPI journal article supplement (doi:10.3390/biology11121736), 2022-11-29
Supplement: s1 [file s1]

**Supplementary Table S1:****Clinical characteristics of the patients undergoing implantation of a left ventricular assist device (LVAD).**

Data are displayed as mean  $\pm$  SEM or in % of all patients as indicated. NYHA indicates New York Heart Association Class.

|                                                                | <b>LVAD<br/>N=17</b> | <b>Normal values</b>       |
|----------------------------------------------------------------|----------------------|----------------------------|
| <b>Age (years)</b>                                             | 59.7 $\pm$ 10.9      |                            |
| <b>Sex (M/F, %)</b>                                            | 94.7/5.3             |                            |
| <b>Echocardiography</b>                                        |                      |                            |
| <b>Ejection fraction (%)</b>                                   | 18.9 $\pm$ 4.9       | <b>&gt;55</b>              |
| <b>Septum thickness (mm)</b>                                   | 29.4 $\pm$ 34.8      | <b><math>\leq</math>11</b> |
| <b>Ischemic cardiomyopathy/<br/>Dilated cardiomyopathy (%)</b> | 35/65                |                            |
| <b>Left ventricular end-diastolic<br/>diameter (mm)</b>        | 68 $\pm$ 10          | <b>33-56</b>               |
| <b>Serum</b>                                                   |                      |                            |
| <b>Creatinine (<math>\mu</math>mol/l)</b>                      | 142.6 $\pm$ 94       | <b>59-104</b>              |
| <b>Clinical Classification</b>                                 |                      |                            |
| <b>NYHA I [% of all patients]</b>                              | 0                    |                            |
| <b>NYHA II [% of all patients]</b>                             | 0                    |                            |
| <b>NYHA III [% of all patients]</b>                            | 35.7                 |                            |
| <b>NYHA IV [% of all patients]</b>                             | <b>64.3</b>          |                            |

Supplemental Figure S1

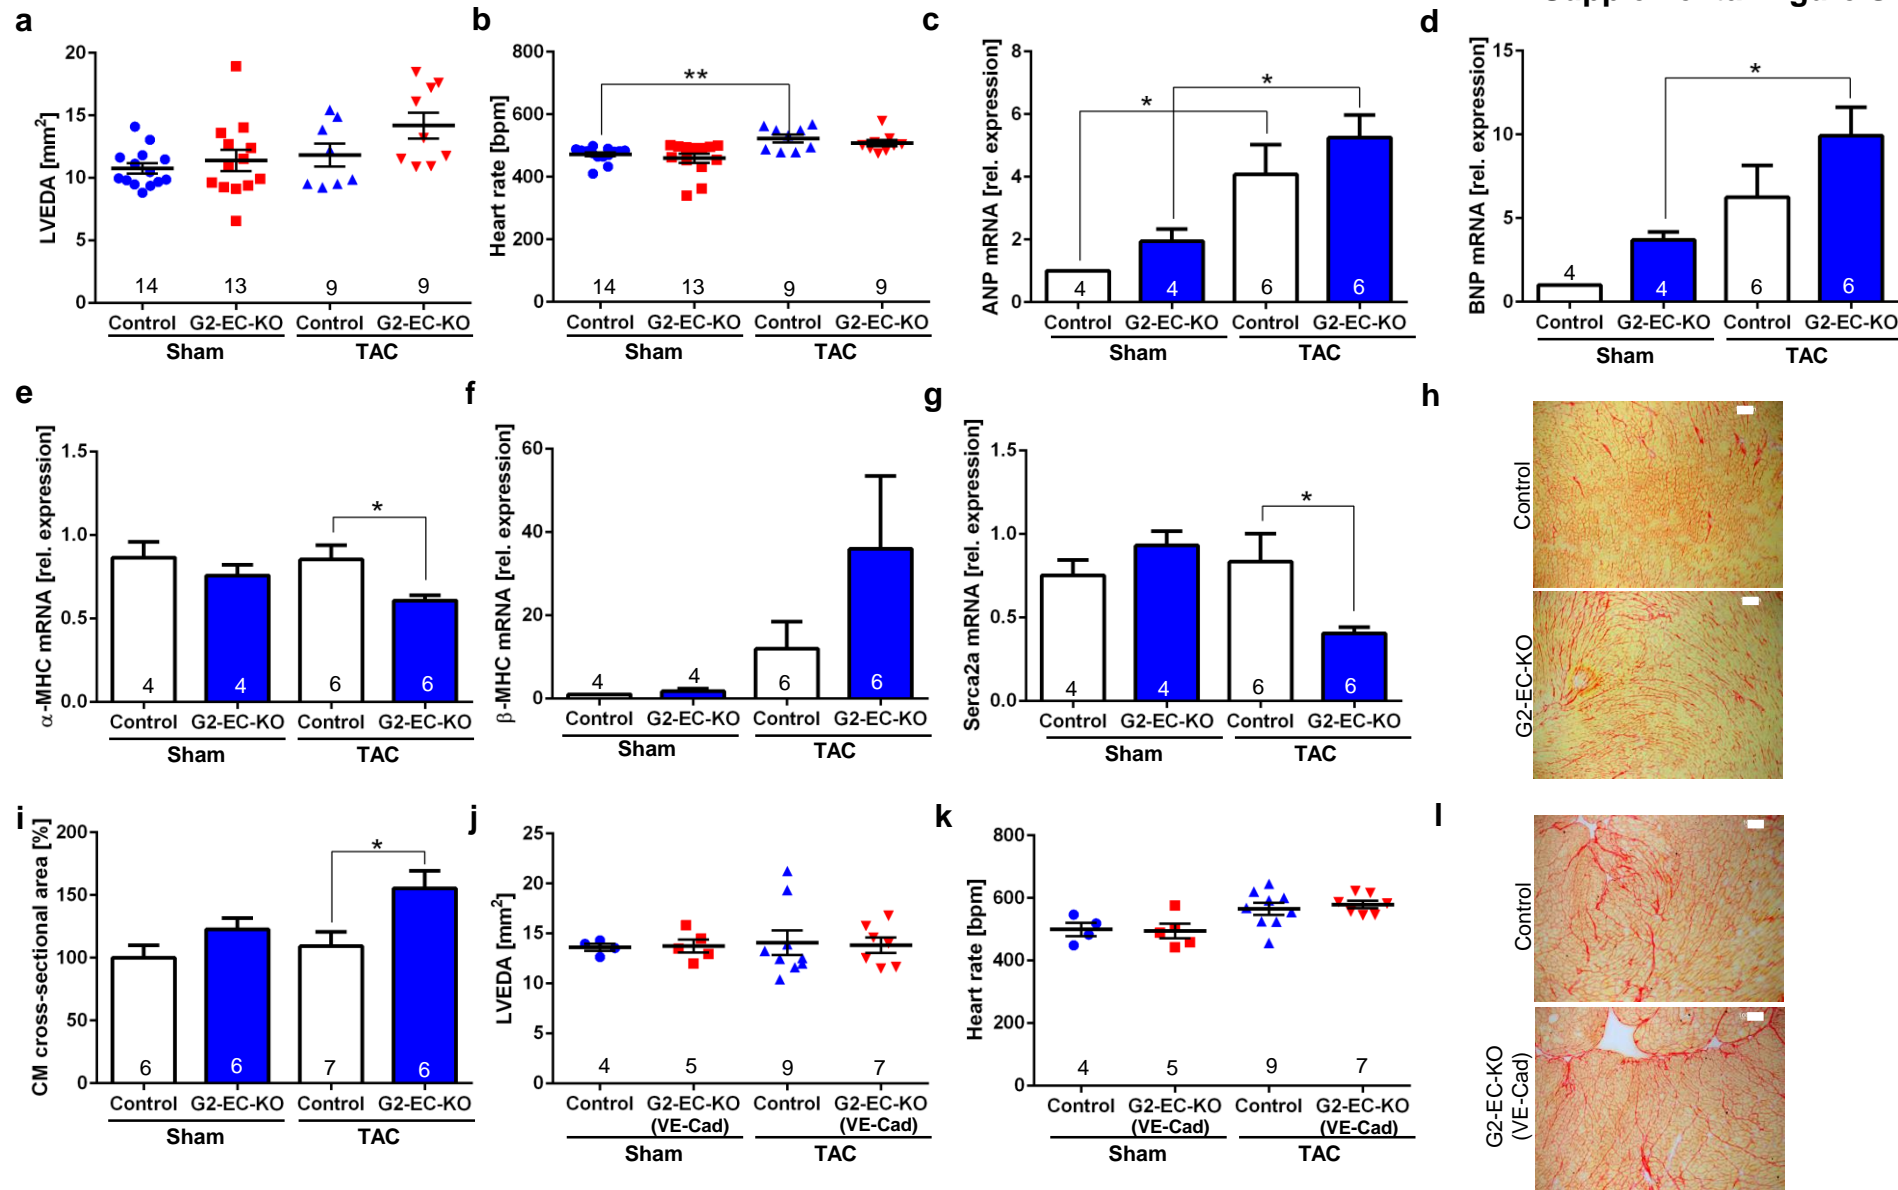

**Supplemental Figure S1: Further characterization of endothelial GATA2 knock-out mice (G2-EC-KO).** a, G2-EC-KO and control mice were subjected to transverse aortic constriction (TAC) or sham surgery and monitored for 2 weeks. Left ventricular end-diastolic area (LVEDA) and heart rate (b) were determined during echocardiography. c-g, qPCR analysis of ANP, BNP,  $\alpha$ -MHC,  $\beta$ -MHC and SERCA2a mRNA expression from mouse hearts. h, Sirius-red staining (scale bar, 100 $\mu$ m) of heart tissue slides and quantification of cardiomyocytes cross-sectional area (i) of the indicated mice two weeks after TAC. j-l, G2-EC-KO (VE-Cad) and control mice were subjected to transverse aortic constriction (TAC) or sham surgery and monitored for 4 weeks. LVEDA (j) and heart rate (k) were determined. l, Sirius-red staining of heart sections (scale bar, 100 $\mu$ m). Data are mean $\pm$ sem; the number of biological replicates is indicated within graphs; \*p<0.05, \*\*p<0.01.

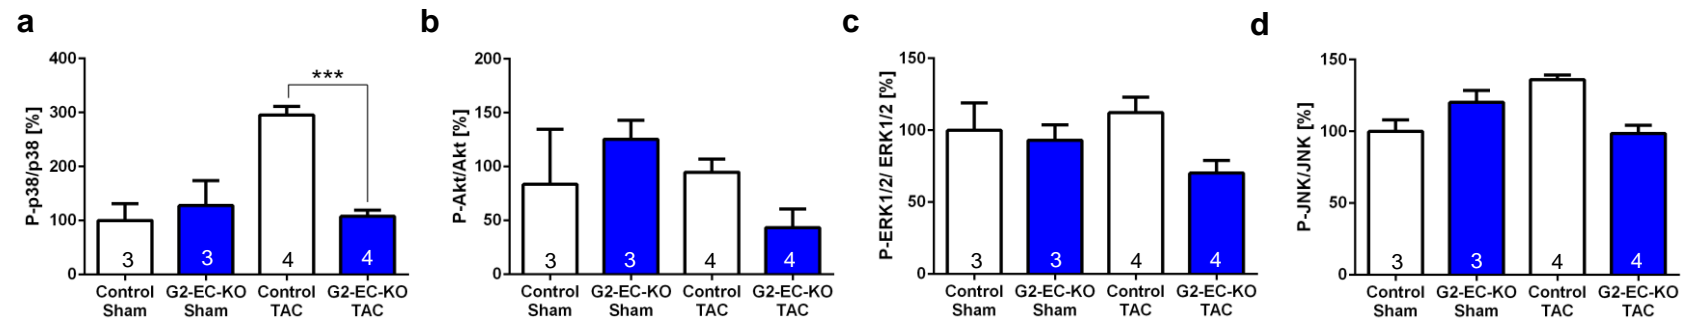

**Supplementary Figure S2: Signal transduction in GATA2 mutant mice. a-d,** Quantification of the immunoblots shown in the Figure 4a. Data are mean  $\pm$  sem; the number of biological replicates is indicated within graphs; \* $p < 0.05$ , \*\*\* $p < 0.001$ .

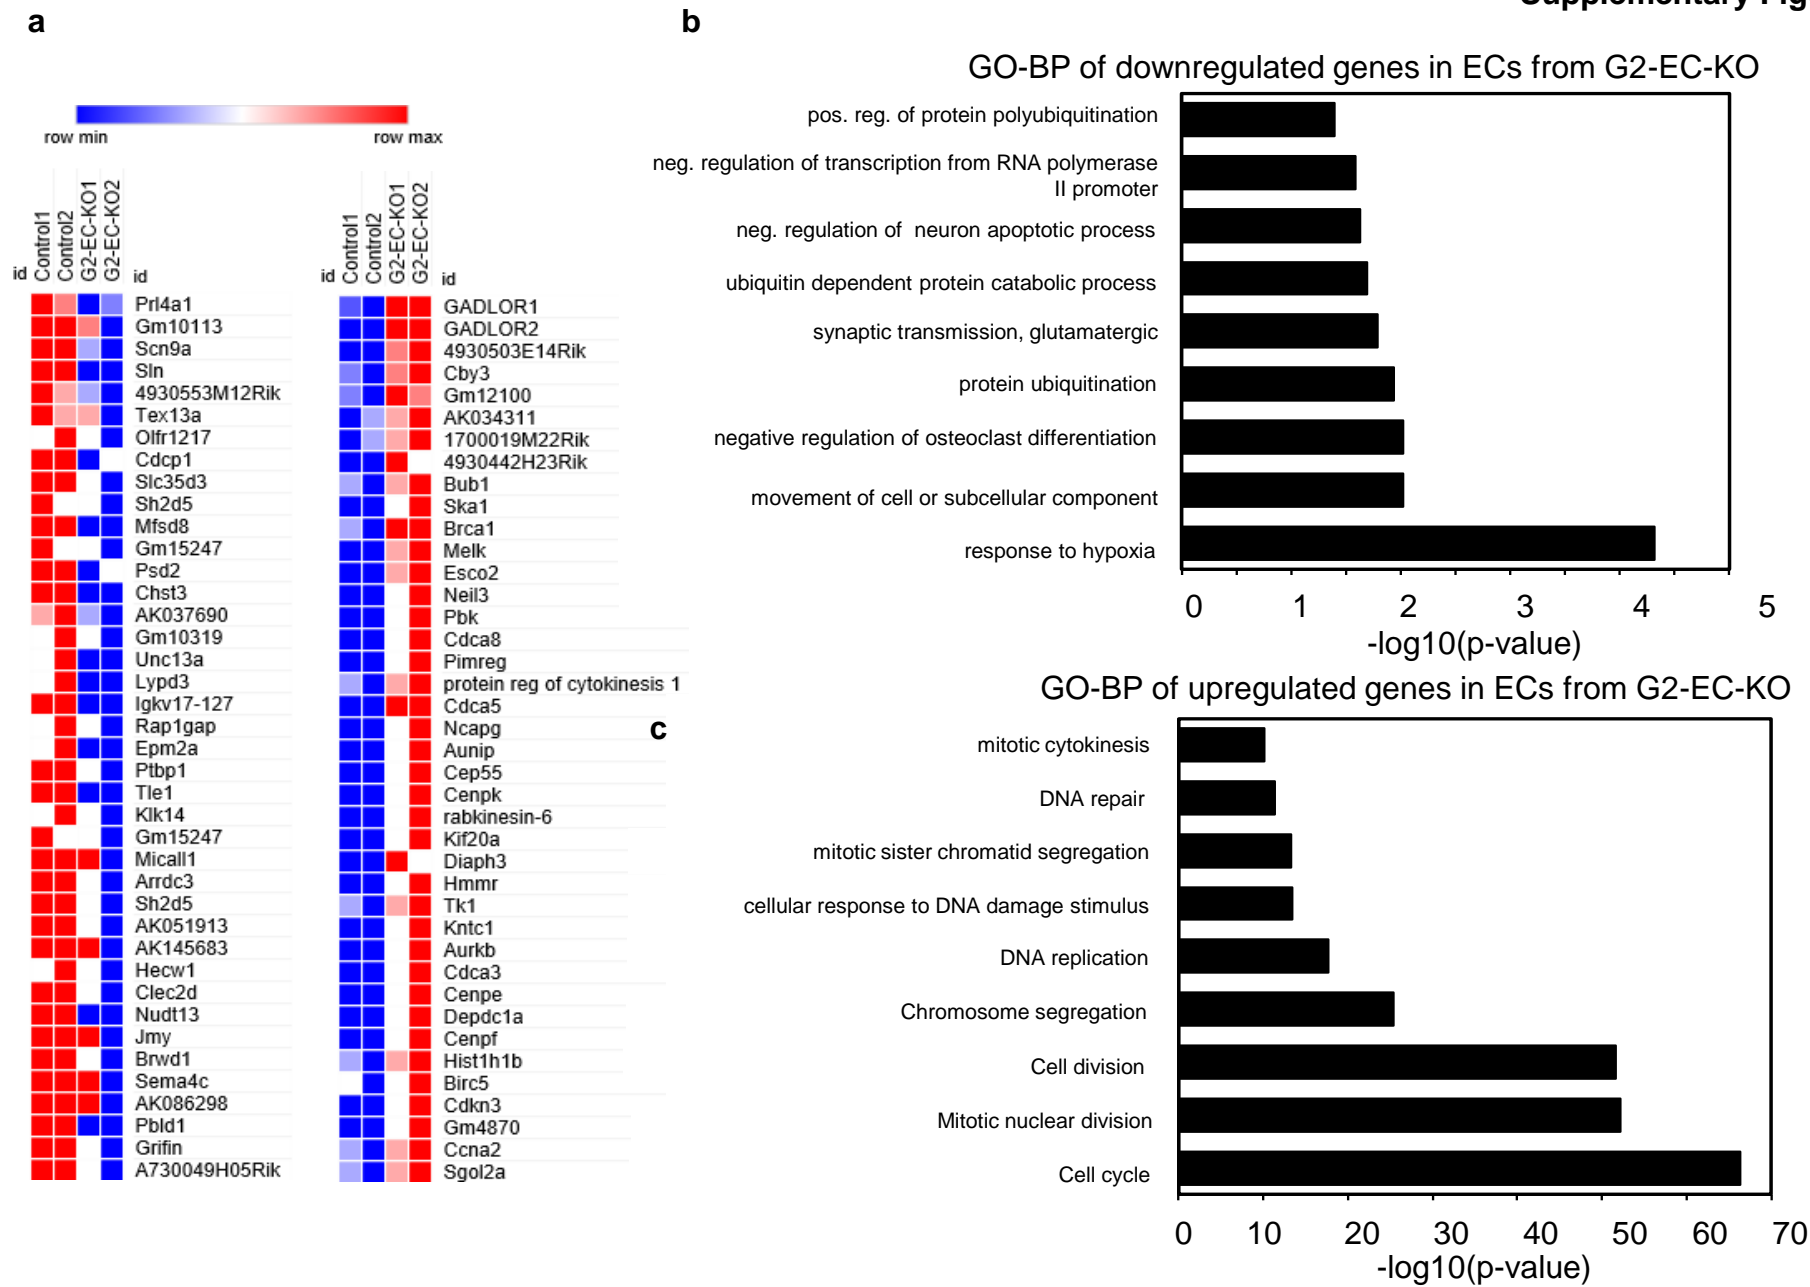

**Supplementary Figure S3: Micro-array analysis of endothelial gene-expression in cardiac endothelial cells of control and G2-EC-KO mice after TAC.** **a**, top 40 down- and up-regulated Genes between both genotypes. **b**, Gene ontology analysis, biological process (GO-BP) of down-regulated and of upregulated genes (**c**).

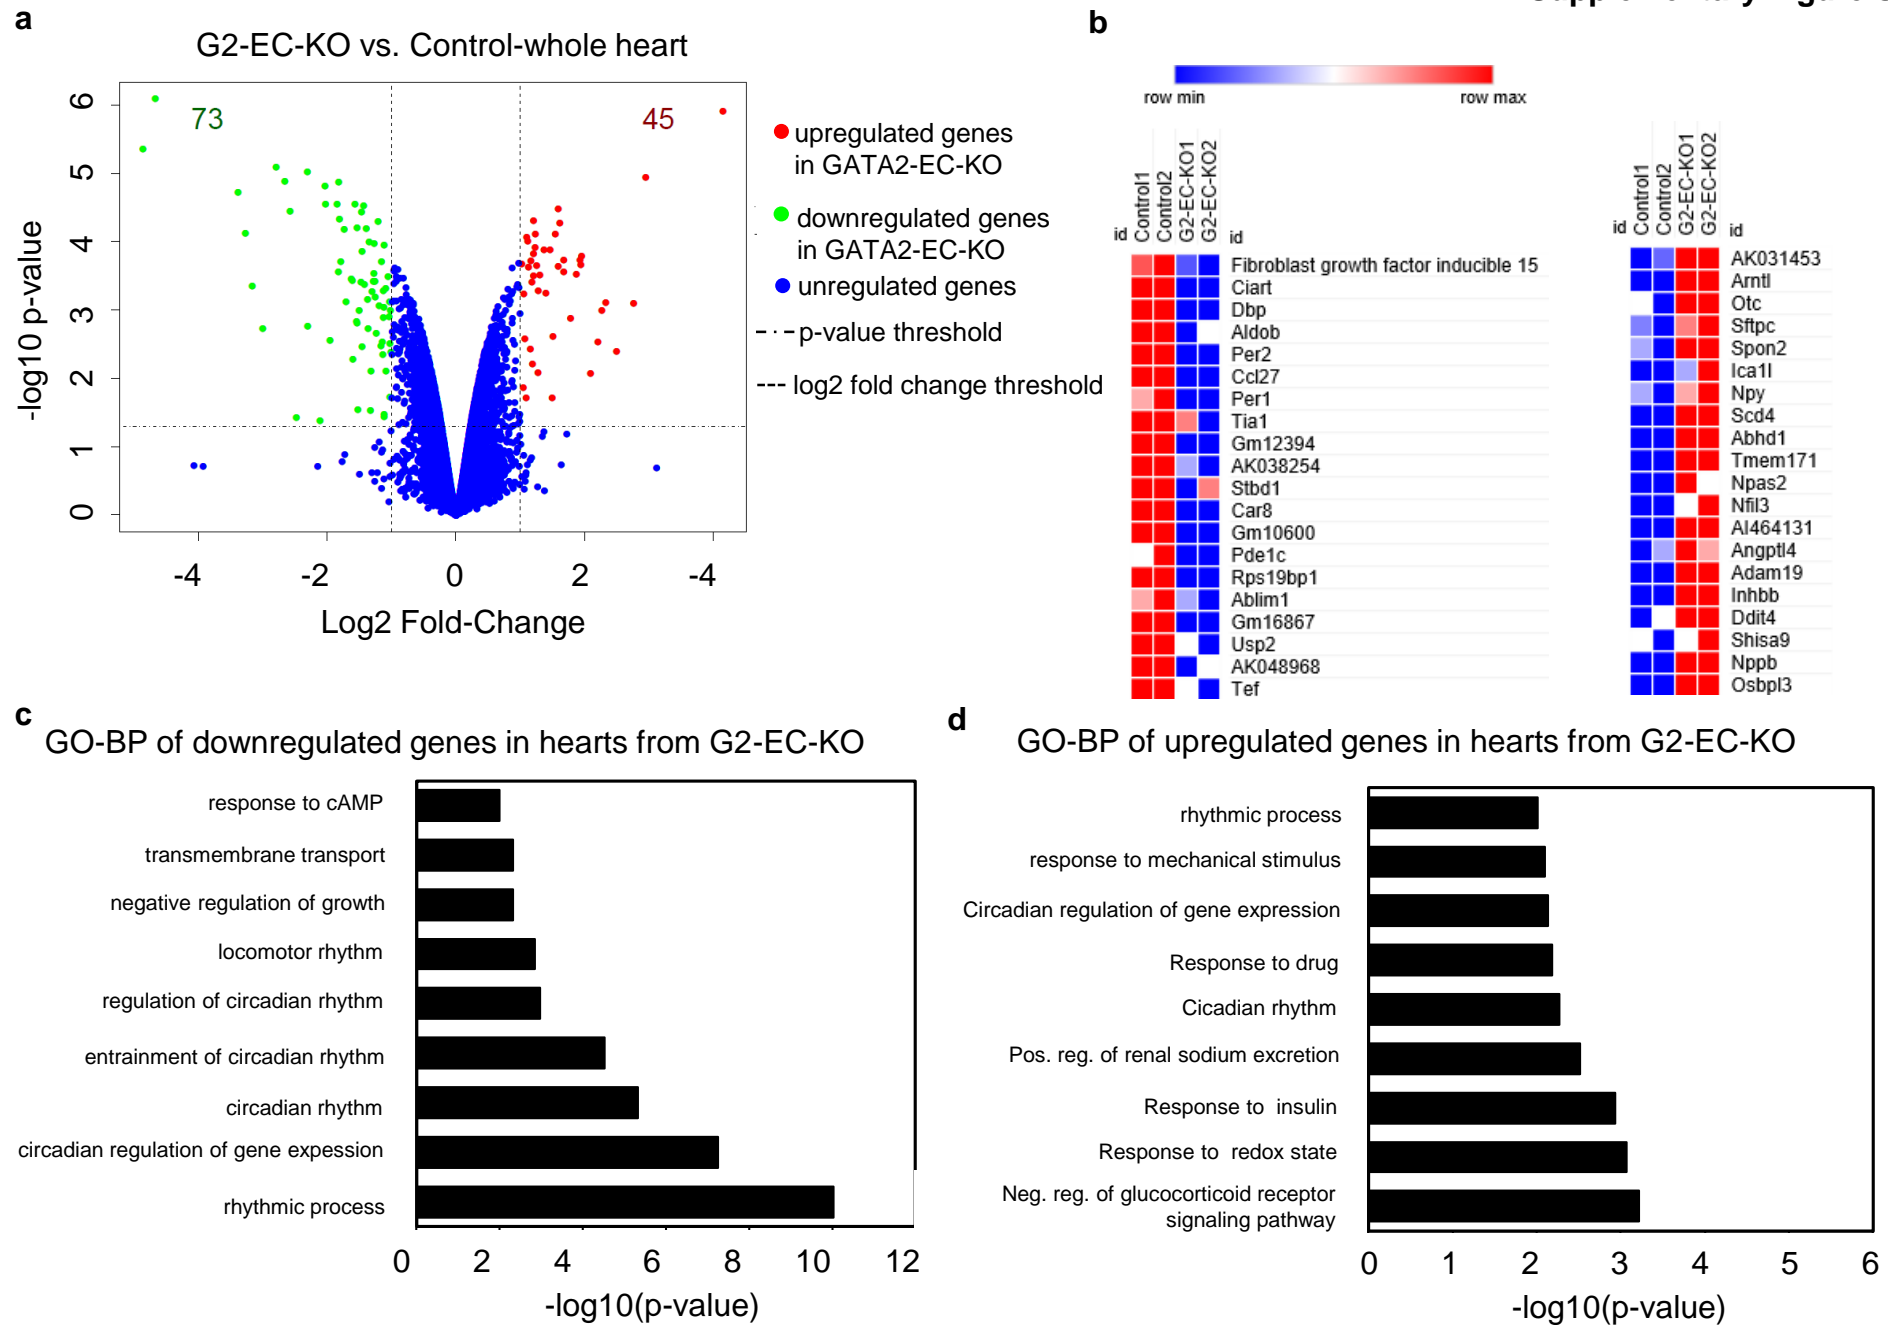

**Supplementary Figure S4: Micro-array analysis of whole hearts of control and G2-EC-KO mice after TAC.** **a**, volcano plot. **b**, top 20 down- and up-regulated genes between both genotypes. **c**, Gene ontology analysis, biological process (GO-BP) of down-regulated and of upregulated genes (**d**).

GADLOR1

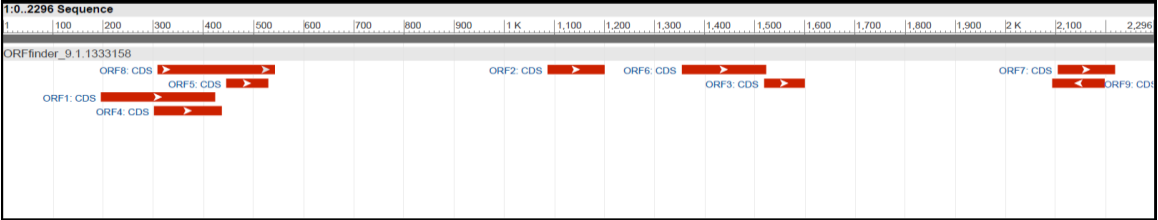

| Label | Strand | Frame | Start | Stop | Length (bp   aa) |
|-------|--------|-------|-------|------|------------------|
| ORF8  | +      | 3     | 309   | 542  | 234   77         |
| ORF1  | +      | 1     | 196   | 423  | 228   75         |
| ORF6  | +      | 2     | 1355  | 1522 | 168   55         |
| ORF4  | +      | 2     | 302   | 436  | 135   44         |
| ORF2  | +      | 1     | 1087  | 1200 | 114   37         |
| ORF7  | +      | 2     | 2105  | 2218 | 114   37         |
| ORF9  | -      | 3     | 2198  | 2094 | 105   34         |
| ORF5  | +      | 2     | 446   | 529  | 84   27          |
| ORF3  | +      | 1     | 1519  | 1599 | 81   26          |

GADLOR2

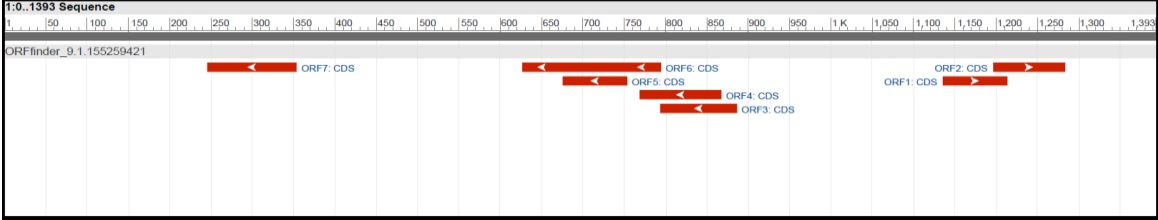

| Label | Strand | Frame | Start | Stop | Length (bp   aa) |
|-------|--------|-------|-------|------|------------------|
| ORF6  | -      | 3     | 794   | 627  | 168   55         |
| ORF7  | -      | 3     | 353   | 246  | 108   35         |
| ORF4  | -      | 2     | 867   | 769  | 99   32          |
| ORF3  | -      | 1     | 886   | 794  | 93   30          |
| ORF2  | +      | 3     | 1197  | 1283 | 87   28          |
| ORF1  | +      | 2     | 1136  | 1213 | 78   25          |
| ORF5  | -      | 2     | 753   | 676  | 78   25          |

Supplemental Figure S5: Short open reading frames in the GADLORs. Analysis of possible open reading frames (ORF) of GADLOR1 and GADLOR2; bp denotes base pairs, aa denotes amino acids.

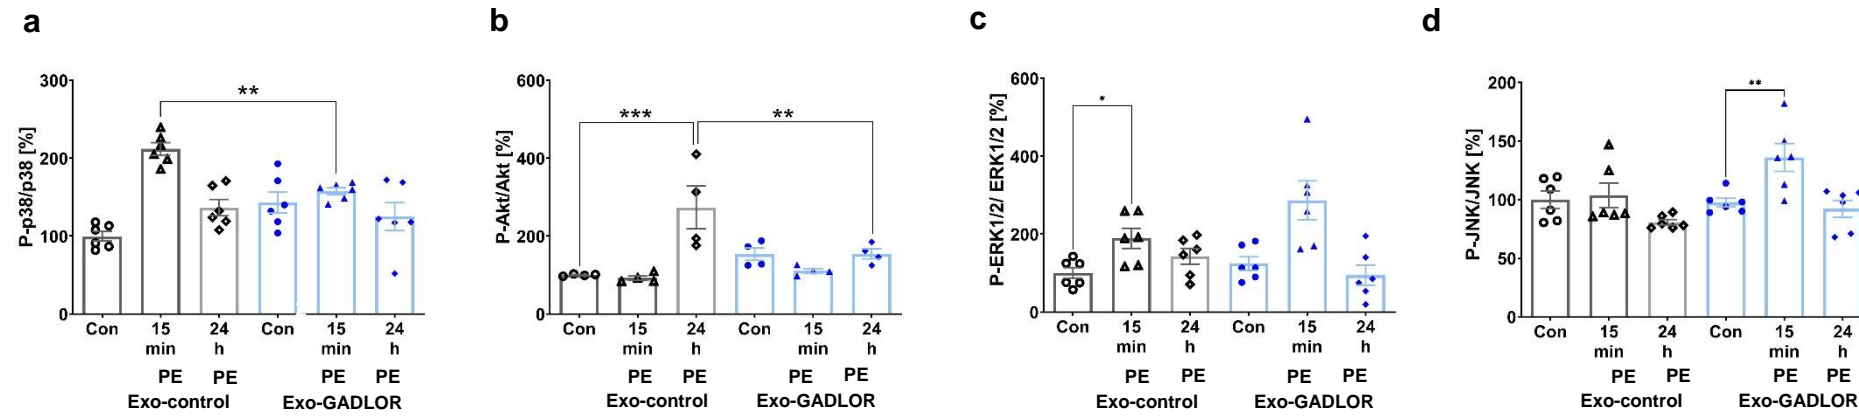

**Supplementary Figure S6: Signal transduction in cardiomyocytes during GADLOR exposure.** a-d, Quantification of the immunoblots shown in the Figure 7b and two additional experiments. Data are mean  $\pm$  sem; the number of biological replicates is indicated within graphs; \*p<0.05, \*\*p<0.01, \*\*\*p<0.001.
